# Supplementary material
Source: Copernicus journal article supplement (doi:10.5194/egusphere-2026-706)
Supplement: Supplementary file 1 [file egusphere-2026-706-supplement.pdf]

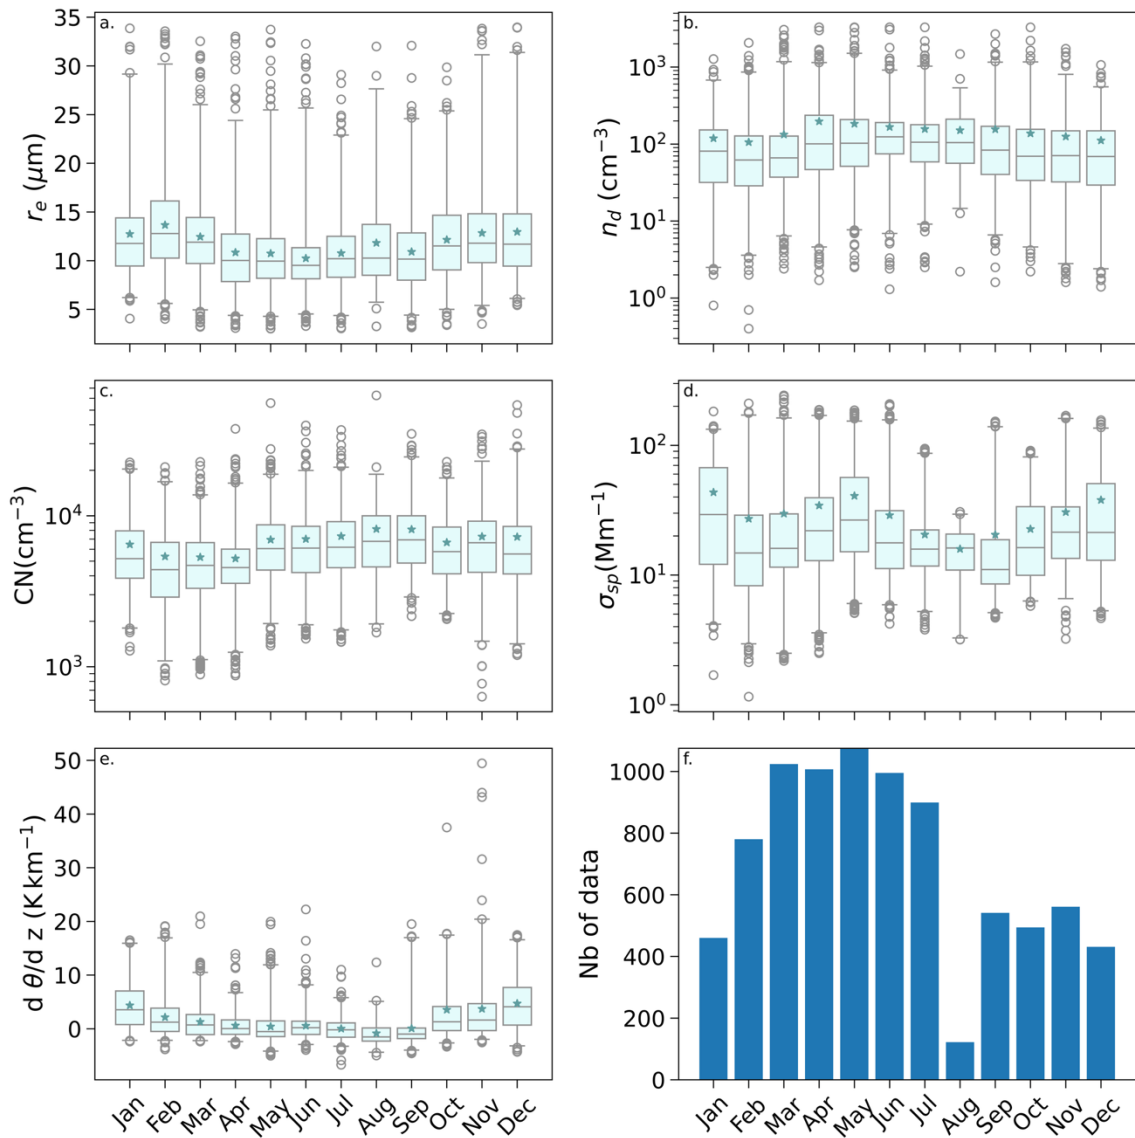

**Figure S1 : Climatologies of (a) cloud droplet effective radius ( $r_e$ ), (b) cloud droplet number concentration ( $n_d$ ), (c) particle concentration (CN), (d) dried aerosol light scattering ( $\sigma_{sp,525nm}$ ), (e) potential temperature vertical gradient ( $d\theta/dz$ ), and (f.) the number of observations (Nb of data) over the ATOLL station when no filters are applied. For subfigures a to e, the box represents the interquartile range (25th–75th percentiles), with the median indicated by a horizontal line and the mean by the star. Whiskers extend to the 1st and 99th percentiles and outliers of the whiskers are shown as individual points.**
